# Supplementary material for: Smarcad1 mediates microbiota-induced inflammation in mouse and coordinates gene expression in the intestinal epithelium
Source: Genome Biol. 2020 Mar 11;21:64. doi: 10.1186/s13059-020-01976-7 (PMC7065452; doi:10.1186/s13059-020-01976-7)
Supplement: Supplementary file 2 — Additional file 2: Table S1. Full statistical analysis data and annotation for the Fig. 3d, 4c, 5b, 6a,b,d, 7a and Additional file 1: Figures S1b-d, S3b,d-f, S4b,c, S6c-f. [file 13059_2020_1976_MOESM2_ESM.xlsx]

## Sheet: Fig3d
Statistical analysis supplementary table 1
Chi-square test with Bonferroni correction Fig. 3d
Bonferroni correction for multiple testing: Significance threshold set at P<0.05/4=0.0125
Two-sided test
RNA-DOWN vs H3K9me3-DOWN					RNA-UP vs H3K9me3-DOWN					RNA-UP vs H3K9me3-UP					RNA-DOWN vs H3K9me3-UP
Chi-square, df	0.0477341, 1				Chi-square, df	9.91121, 1				Chi-square, df	0.591046, 1				Chi-square, df	2.01401, 1
z	0.218481				z	3.14821				z	0.768795				z	1.41916
P value	0.8271				P value	0.0016				P value	0.442				P value	0.1559
P value summary	ns				P value summary	**				P value summary	ns				P value summary	ns
Statistically significant (P < 0.05)?	No				Statistically significant (P < 0.05)?	Yes				Statistically significant (P < 0.05)?	No				Statistically significant (P < 0.05)?	No
Data analyzed	H3K9me3-notDOWN	H3K9me3-DOWN	Total		Data analyzed	H3K9me3-notDOWN	H3K9me3-DOWN	Total		Data analyzed	H3K9me3-notUP	H3K9me3-UP	Total		Data analyzed	H3K9me3-notUP	H3K9me3-UP	Total
RNA-notDOWN	22598	2549	25147		RNA-notUP	22582	2514	25096		RNA-notUP	24923	169	25092		RNA-notDOWN	25063	165	25228
RNA-DOWN	737	81	818		RNA-UP	757	116	873		RNA-UP	869	4	873		RNA-DOWN	729	8	737
Total	23335	2630	25965		Total	23339	2630	25969		Total	25792	173	25965		Total	25792	173	25965
Percentage of row total	H3K9me3-notDOWN	H3K9me3-DOWN			Percentage of row total	H3K9me3-notDOWN	H3K9me3-DOWN			Percentage of row total	H3K9me3-notUP	H3K9me3-UP			Percentage of row total	H3K9me3-notUP	H3K9me3-UP
RNA-notDOWN	89.86%	10.14%			RNA-notUP	89.98%	10.02%			RNA-notUP	99.33%	0.67%			RNA-notDOWN	99.35%	0.65%
RNA-DOWN	90.10%	9.90%			RNA-UP	86.71%	13.29%			RNA-UP	99.54%	0.46%			RNA-DOWN	98.91%	1.09%
Percentage of column total	H3K9me3-notDOWN	H3K9me3-DOWN			Percentage of column total	H3K9me3-notDOWN	H3K9me3-DOWN			Percentage of column total	H3K9me3-notUP	H3K9me3-UP			Percentage of column total	H3K9me3-notUP	H3K9me3-UP
RNA-notDOWN	96.84%	96.92%			RNA-notUP	96.76%	95.59%			RNA-notUP	96.63%	97.69%			RNA-notDOWN	97.17%	95.38%
RNA-DOWN	3.16%	3.08%			RNA-UP	3.24%	4.41%			RNA-UP	3.37%	2.31%			RNA-DOWN	2.83%	4.62%
Percentage of grand total	H3K9me3-notDOWN	H3K9me3-DOWN			Percentage of grand total	H3K9me3-notDOWN	H3K9me3-DOWN			Percentage of grand total	H3K9me3-notUP	H3K9me3-UP			Percentage of grand total	H3K9me3-notUP	H3K9me3-UP
RNA-notDOWN	87.03%	9.82%			RNA-notUP	86.96%	9.68%			RNA-notUP	95.99%	0.65%			RNA-notDOWN	96.53%	0.64%
RNA-DOWN	2.84%	0.31%			RNA-UP	2.92%	0.45%			RNA-UP	3.35%	0.02%			RNA-DOWN	2.81%	0.03%
Overlap lists:
RNA-DOWN vs H3K9me3-DOWN					RNA-UP vs H3K9me3-DOWN					RNA-UP vs H3K9me3-UP					RNA-DOWN vs H3K9me3-UP
1810046K07Rik					1110051M20Rik					Cry2					Dst
4930402H24Rik					1700011J10Rik					Ptprd					Apbb2
6330578E17Rik					2210016F16Rik					Magi2					Lrrc8b
Abhd3					2410089E03Rik					Tlr1					Nrn1
Acer3					2510009E07Rik										Apobec3
Actl6a					2610008E11Rik										1600021P15Rik
Agpat4					2610035D17Rik										Gbe1
Aifm1					2810474O19Rik										Tiam1
Aldh1l2					5830428H23Rik
Apbb2					9130404H23Rik
Atp7b					A430108G06Rik
Atrn					Abca8b
Bcmo1					Adck3
Btbd9					Ahi1
Cdkl3					Aig1
Cgrrf1					Akr1d1
Chuk					Als2cr12
Cml5					Arhgap31
Col25a1					Arhgef3
Csgalnact1					Atf7ip2
Cybrd1					B3galtl
Cyp2c29					BC025446
Cyp2c66					Bok
Cyp2d26					Btnl9
Dhrs7					C030039L03Rik
Dmbt1					Ccdc162
Dnahc8					Cd177
Dpf3					Cela1
Elovl6					Celsr1
Ept1					Clec2g
Esrrg					Clec2h
Fam126a					Csrp1
Fam47e					Ctnnal1
Fam81a					Cyp2j5
Fras1					Cyp39a1
Gda					Cyp4f15
Gm14230					Ddx3y
Gm20388					Deptor
Gphn					Dync2li1
Grm4					Egf
Gsr					Emp3
H2-Q6					Fam111a
H2-Q7					Fhit
Hk1					Foxp1
Hmga1-rs1					Fstl4
Hps3					Gab1
Hsd17b13					Gatsl2
Inpp5a					Gm14443
Lactb2					Gm15675
Lgals9					Gm16233
Lipg					Gm20499
Lyrm7					Hydin
Mapk8					Ifit1
Mfsd9					Ift74
Nipa2					Itln1
Nsdhl					Katnal1
Ola1					Kirrel2
Pafah2					Lama3
Pcsk5					Lbh
Pcsk6					Lyz1
Pppde1					Macrod1
Pygl					Magi2
Qrsl1					Me3
Rbbp8					Mmp7
Rbm47					Myl9
Rph3al					Mylip
Rragd					Nceh1
Scarb1					Nxf7
Sec14l4					Oxct1
Sept11					P2rx4
Slc39a11					Patz1
Slc7a8					Pgcp
Smoc1					Phyh
Snx7					Pla2g2a
Tank					Plbd1
Tmed7					Plcl2
Tmem14c					Pnliprp2
Tsku					Polm
Ugt1a7c					Ppil1
Vps37a					Prelp
Wnk2					Prmt2
					Ptprd
					Rftn2
					Rgnef
					Rnf144b
					Rnf32
					Sdc2
					Serpina1b
					Serpina1e
					Slc12a8
					Slc27a2
					Slc30a2
					Smyd3
					Snx10
					Socs2
					Spink4
					Stox1
					Sytl2
					Tacc1
					Tbcel
					Tec
					Timp2
					Tinag
					Tlr4
					Tmed4
					Tmem117
					Tmem44
					Tox
					Trim24
					Tshz2
					Ttll6
					Upb1
					Vnn3
					Zcchc3
					Zfp949
					Zranb3

## Sheet: Fig.4c
Statistical analysis supplementary table 1
Chi-square test with Bonferroni correction Fig. 3d
Bonferroni correction for multiple testing: Significance threshold set at P<0.05/4=0.0125
Two-sided test
RNA-DOWN vs H3K9me3-DOWN					RNA-UP vs H3K9me3-DOWN					RNA-UP vs H3K9me3-UP					RNA-DOWN vs H3K9me3-UP
Chi-square, df	1.30253, 1				Chi-square, df	13.2984, 1				Chi-square, df	3.30056, 1				Chi-square, df	49.2671, 1
z	1.14128				z	3.64669				z	1.81674				z	7.01906
P value	0.2538				P value	0.0003				P value	0.0693				P value	<0.0001
P value summary	ns				P value summary	***				P value summary	ns				P value summary	****
Statistically significant (P < 0.05)?	No				Statistically significant (P < 0.05)?	Yes				Statistically significant (P < 0.05)?	No				Statistically significant (P < 0.05)?	Yes
Data analyzed	H3K9me3-notDOWN	H3K9me3-DOWN	Total		Data analyzed	H3K9me3-notDOWN	H3K9me3-DOWN	Total		Data analyzed	H3K9me3-notUP	H3K9me3-UP	Total		Data analyzed	H3K9me3-notUP	H3K9me3-UP	Total
RNA-notDOWN	25753	156	25909		RNA-notUP	25771	155	25926		RNA-notUP	25796	130	25926		RNA-notDOWN	25782	127	25909
RNA-DOWN	55	1	56		RNA-UP	37	2	39		RNA-UP	38	1	39		RNA-DOWN	52	4	56
Total	25808	157	25965		Total	25808	157	25965		Total	25834	131	25965		Total	25834	131	25965
Percentage of row total	H3K9me3-notDOWN	H3K9me3-DOWN			Percentage of row total	H3K9me3-notDOWN	H3K9me3-DOWN			Percentage of row total	H3K9me3-notUP	H3K9me3-UP			Percentage of row total	H3K9me3-notUP	H3K9me3-UP
RNA-notDOWN	99.40%	0.60%			RNA-notUP	99.40%	0.60%			RNA-notUP	99.50%	0.50%			RNA-notDOWN	99.51%	0.49%
RNA-DOWN	98.21%	1.79%			RNA-UP	94.87%	5.13%			RNA-UP	97.44%	2.56%			RNA-DOWN	92.86%	7.14%
Percentage of column total	H3K9me3-notDOWN	H3K9me3-DOWN			Percentage of column total	H3K9me3-notDOWN	H3K9me3-DOWN			Percentage of column total	H3K9me3-notUP	H3K9me3-UP			Percentage of column total	H3K9me3-notUP	H3K9me3-UP
RNA-notDOWN	99.79%	99.36%			RNA-notUP	99.86%	98.73%			RNA-notUP	99.85%	99.24%			RNA-notDOWN	99.80%	96.95%
RNA-DOWN	0.21%	0.64%			RNA-UP	0.14%	1.27%			RNA-UP	0.15%	0.76%			RNA-DOWN	0.20%	3.05%
Percentage of grand total	H3K9me3-notDOWN	H3K9me3-DOWN			Percentage of grand total	H3K9me3-notDOWN	H3K9me3-DOWN			Percentage of grand total	H3K9me3-notUP	H3K9me3-UP			Percentage of grand total	H3K9me3-notUP	H3K9me3-UP
RNA-notDOWN	99.18%	0.60%			RNA-notUP	99.25%	0.60%			RNA-notUP	99.35%	0.50%			RNA-notDOWN	99.30%	0.49%
RNA-DOWN	0.21%	3.85e-003%			RNA-UP	0.14%	0.01%			RNA-UP	0.15%	3.85e-003%			RNA-DOWN	0.20%	0.02%

## Sheet: Fig.5b
Statistical analysis supplementary table 1
Chi-square test with Bonferroni correction Fig. 5b
Bonferroni correction for multiple testing: Significance threshold set at P<0.05/4=0.0125
Two-sided test
accessibility-DOWN vs H3K9me3-UP					accessibility-UP vs H3K9me3-DOWN
Chi-square, df	170.960, 1				Chi-square, df	36.6802, 1
z	13.0752				z	6.05641
P value	<0.0001				P value	<0.0001
P value summary	****				P value summary	****
Statistically significant (P < 0.05)?	Yes				Statistically significant (P < 0.05)?	Yes
Data analyzed	H3K9me3-notDOWN	H3K9me3-DOWN	Total		Data analyzed	H3K9me3-notUP	H3K9me3-UP	Total
accessibility-notUP	23385	2559	25944		accessibility-notDOWN	25793	168	25961
accessibility-UP	1	20	21		accessibility-DOWN	3	1	4
Total	23386	2579	25965		Total	25796	169	25965
Percentage of row total	H3K9me3-notDOWN	H3K9me3-DOWN			Percentage of row total	H3K9me3-notUP	H3K9me3-UP
accessibility-notUP	90.14%	9.86%			accessibility-notDOWN	99.35%	0.65%
accessibility-UP	4.76%	95.24%			accessibility-DOWN	75.00%	25.00%
Percentage of column total	H3K9me3-notDOWN	H3K9me3-DOWN			Percentage of column total	H3K9me3-notUP	H3K9me3-UP
accessibility-notUP	100.00%	99.22%			accessibility-notDOWN	99.99%	99.41%
accessibility-UP	4.28e-003%	0.78%			accessibility-DOWN	0.01%	0.59%
Percentage of grand total	H3K9me3-notDOWN	H3K9me3-DOWN			Percentage of grand total	H3K9me3-notUP	H3K9me3-UP
accessibility-notUP	90.06%	9.86%			accessibility-notDOWN	99.34%	0.65%
accessibility-UP	3.85e-003%	0.08%			accessibility-DOWN	0.01%	3.85e-003%

## Sheet: Fig6a
Statistical analysis supplementary table 1
biologically relevant comparisons shown in bold text
2-way ANOVA Fig. 6a					weight curve
Compare each cell mean with the other cell mean in that row
Number of families	1
Number of comparisons per family	18
Alpha	0.01
Holm-Sidak's multiple comparisons test	Mean Diff.	Significant?	Summary	Adjusted P Value
Smarcad1 KO - WT
Row 1	-0.4	No	ns	>0.9999
Row 2	0.2	No	ns	>0.9999
Row 3	0	No	ns	>0.9999
Row 4	0	No	ns	>0.9999
Row 5	0	No	ns	>0.9999
Row 6	-0.2	No	ns	>0.9999
Row 7	0.2	No	ns	>0.9999
Row 8	0.6	No	ns	>0.9999
Row 9	-2.2	No	ns	0.9847
Row 10	0.8	No	ns	>0.9999
Row 11	1	No	ns	>0.9999
Row 12	0	No	ns	>0.9999
Row 13	-1.6	No	ns	0.9995
Row 14	-0.6	No	ns	>0.9999
Row 15	-0.6	No	ns	>0.9999
Row 16	0.4	No	ns	>0.9999
Row 17	-0.6	No	ns	>0.9999
Row 18	1.2	No	ns	>0.9999
Test details	Mean 1	Mean 2	Mean Diff.	SE of diff.	N1	N2	t	DF
Smarcad1 KO - WT
Row 1	99.6	100	-0.4	1.737	5	5	0.2303	144
Row 2	100.2	100	0.2	1.737	5	5	0.1152	144
Row 3	100	100	0	1.737	5	5	0	144
Row 4	100.2	100.2	0	1.737	5	5	0	144
Row 5	99.8	99.8	0	1.737	5	5	0	144
Row 6	99.8	100	-0.2	1.737	5	5	0.1152	144
Row 7	99.8	99.6	0.2	1.737	5	5	0.1152	144
Row 8	100.4	99.8	0.6	1.737	5	5	0.3455	144
Row 9	98.6	100.8	-2.2	1.737	5	5	1.267	144
Row 10	99.2	98.4	0.8	1.737	5	5	0.4606	144
Row 11	99	98	1	1.737	5	5	0.5758	144
Row 12	95.2	95.2	0	1.737	5	5	0	144
Row 13	97.4	99	-1.6	1.737	5	5	0.9212	144
Row 14	97.4	98	-0.6	1.737	5	5	0.3455	144
Row 15	97.4	98	-0.6	1.737	5	5	0.3455	144
Row 16	97.4	97	0.4	1.737	5	5	0.2303	144
Row 17	97	97.6	-0.6	1.737	5	5	0.3455	144
Row 18	98.6	97.4	1.2	1.737	5	5	0.6909	144
Two-way RM ANOVA	Matching: Stacked
Assume sphericity?	Yes
Alpha	0.05
Source of Variation	% of total variation	P value	P value summary	Significant?
Interaction	2.106	0.9977	ns	No
Time	22.74	0.0001	***	Yes
Smarcad1-KO	0.03113	0.9037	ns	No
Subject	15.97	<0.0001	****	Yes
ANOVA table	SS	DF	MS	F (DFn, DFd)	P value
Interaction	30.45	17	1.791	F (17, 136) = 0.2849	P=0.9977
Time	328.8	17	19.34	F (17, 136) = 3.075	P=0.0001
Smarcad1-KO	0.45	1	0.45	F (1, 8) = 0.01560	P=0.9037
Subject	230.8	8	28.85	F (8, 136) = 4.588	P<0.0001
Residual	855.2	136	6.288
Difference between column means
Mean of Smarcad1 KO	98.72
Mean of WT	98.82
Difference between means	-0.1
SE of difference	0.8007
95% CI of difference	-1.946 to 1.746
Data summary
Number of columns (Smarcad1-KO)	2
Number of rows (Time)	18
Number of subjects (Subject)	10
missing values:	0

## Sheet: Fig6b exp1
Statistical analysis supplementary table 1
biologically relevant comparisons shown in bold text
2-way ANOVA Fig. 6b experiment 1					weight curve
Compare each cell mean with the other cell mean in that row
Number of families	1
Number of comparisons per family	18
Alpha	0.01
Holm-Sidak's multiple comparisons test	Mean Diff.	Significant?	Summary	Adjusted P Value
KO-WT
day -2	0.2	No	ns	>0.9999
day -1	0.4	No	ns	>0.9999
day 0	0	No	ns	>0.9999
day 1	0	No	ns	>0.9999
day 2	0.6	No	ns	>0.9999
day 3	1	No	ns	0.9988
day 4	3.2	No	ns	0.585
day 5	1.2	No	ns	0.9979
day 6	0	No	ns	>0.9999
day 7	0	No	ns	>0.9999
day 8	1.8	No	ns	0.9746
day 9	2.8	No	ns	0.7334
day 10	4.6	No	ns	0.1201
day 11	4.8	No	ns	0.0948
day 12	6	No	*	0.0124
day 13	8.2	Yes	***	0.0001
day 14	11	Yes	****	<0.0001
day 15	11.8	Yes	****	<0.0001
Test details	Mean 1	Mean 2	Mean Diff.	SE of diff.	N1	N2	t	DF
KO-WT
Row 1	100.8	100.6	0.2	1.757	5	5	0.1138	144
Row 2	99.6	99.2	0.4	1.757	5	5	0.2276	144
Row 3	99.8	99.8	0	1.757	5	5	0	144
Row 4	99.2	99.2	0	1.757	5	5	0	144
Row 5	100	99.4	0.6	1.757	5	5	0.3415	144
Row 6	100	99	1	1.757	5	5	0.5691	144
Row 7	100.8	97.6	3.2	1.757	5	5	1.821	144
Row 8	100.6	99.4	1.2	1.757	5	5	0.6829	144
Row 9	100.2	100.2	0	1.757	5	5	0	144
Row 10	100	100	0	1.757	5	5	0	144
Row 11	100.4	98.6	1.8	1.757	5	5	1.024	144
Row 12	100.8	98	2.8	1.757	5	5	1.593	144
Row 13	100	95.4	4.6	1.757	5	5	2.618	144
Row 14	99.2	94.4	4.8	1.757	5	5	2.732	144
Row 15	99	93	6	1.757	5	5	3.415	144
Row 16	98.6	90.4	8.2	1.757	5	5	4.666	144
Row 17	99.6	88.6	11	1.757	5	5	6.26	144
Row 18	99.6	87.8	11.8	1.757	5	5	6.715	144
Two-way RM ANOVA	Matching: Stacked
Assume sphericity?	Yes
Alpha	0.05
Source of Variation	% of total variation	P value	P value summary	Significant?
Interaction	20.2	<0.0001	****	Yes
Time	28.51	<0.0001	****	Yes
genotype	15.03	0.0049	**	Yes
Subject	8.125	<0.0001	****	Yes
ANOVA table	SS	DF	MS	F (DFn, DFd)	P value
Interaction	619.2	17	36.42	F (17, 136) = 5.743	P<0.0001
Time	874.2	17	51.42	F (17, 136) = 8.109	P<0.0001
genotype	460.8	1	460.8	F (1, 8) = 14.80	P=0.0049
Subject	249.1	8	31.14	F (8, 136) = 4.910	P<0.0001
Residual	862.5	136	6.342
Difference between column means
Mean of KO	99.9
Mean of WT	96.7
Difference between means	3.2
SE of difference	0.8319
95% CI of difference	1.282 to 5.118
Data summary
Number of columns (genotype)	2
Number of rows (Time)	18
Number of subjects (Subject)	10
Number of missing values:	0

## Sheet: Fig6b exp2
Statistical analysis supplementary table 1
biologically relevant comparisons shown in bold text
2-way ANOVA Fig. 6b experiment 2					weight curve
Compare each cell mean with the other cell mean in that row
Number of families	1
Number of comparisons per family	13
Alpha	0.05
Holm-Sidak's multiple comparisons test	Predicted (LS) mean diff.	Significant?	Summary	Adjusted P Value
KO-WT
day 0	0	No	ns	>0.9999
day 1	-1.49	No	ns	0.98
day 2	-1.456	No	ns	0.98
day 3	-1.168	No	ns	0.98
day 5	-2.238	No	ns	0.9548
day 7	-3.017	No	ns	0.9024
day 8	-6.121	No	ns	0.277
day 9	-6.587	No	ns	0.2251
day 10	-7.9	No	ns	0.0872
day 11	-11.1	Yes	**	0.0045
day 12	-11.07	Yes	**	0.0045
day 13	-10.96	Yes	**	0.0045
day 14	-10.47	Yes	**	0.0072
Test details	Predicted (LS) mean 1	Predicted (LS) mean 2	Predicted (LS) mean diff.	SE of diff.	N1	N2	t	DF
KO-WT
day 0	100	100	0	3.033	8	6	0	156
day 1	100.8	102.3	-1.49	3.033	8	6	0.4911	156
day 2	100.7	102.1	-1.456	3.033	8	6	0.4801	156
day 3	100.3	101.4	-1.168	3.033	8	6	0.3851	156
day 5	100	102.3	-2.238	3.033	8	6	0.7377	156
day 7	98.25	101.3	-3.017	3.033	8	6	0.9946	156
day 8	97.99	104.1	-6.121	3.033	8	6	2.018	156
day 9	98.02	104.6	-6.587	3.033	8	6	2.172	156
day 10	92.87	100.8	-7.9	3.033	8	6	2.605	156
day 11	91.09	102.2	-11.1	3.033	8	6	3.658	156
day 12	89.2	100.3	-11.07	3.033	8	6	3.649	156
day 13	88.7	99.66	-10.96	3.033	8	6	3.615	156
day 14	89.03	99.49	-10.47	3.033	8	6	3.452	156
Two-way RM ANOVA	Matching: Stacked
Assume sphericity?	Yes
Alpha	0.05
Source of Variation	% of total variation	P value	P value summary	Significant?
Interaction	8.601	<0.0001	****	Yes
Time	16.25	<0.0001	****	Yes
genotype	16.12	0.0259	*	Yes
Subject	29.95	<0.0001	****	Yes
ANOVA table	SS	DF	MS	F (DFn, DFd)	P value
Interaction	761.5	12	63.46	F (12, 144) = 4.028	P<0.0001
Time	1438	12	119.9	F (12, 144) = 7.607	P<0.0001
genotype	1428	1	1428	F (1, 12) = 6.461	P=0.0259
Subject	2651	12	221	F (12, 144) = 14.02	P<0.0001
Residual	2269	144	15.76
Difference between column means
Mean of KO	95.92
Mean of WT	101.6
Difference between means	-5.659
SE of difference	2.227
95% CI of difference	-10.51 to -0.8082
Data summary
Number of columns (genotype)	2
Number of rows (Time)	13
Number of subjects (Subject)	14
Number of missing values:	26 (due to unequal n per genotype)
	measurements form days 4 and 6 were skipped completely for ANOVA analysis as values were missing in 8 cases from these days, while ANOVA requires complete column datasets.

## Sheet: Fig6d
Statistical analysis supplementary table 1
biologically relevant comparisons shown in bold text
2-way ANOVA Fig. 6d
Table Analyzed	epitelial MPO+ cells /mm2								Table Analyzed	sub-epitelial MPO+ cells /mm2
Two-way ANOVA	Ordinary								Two-way ANOVA	Ordinary
Alpha	0.05								Alpha	0.05
Source of Variation	% of total variation	P value	P value summary	Significant?					Source of Variation	% of total variation	P value	P value summary	Significant?
Interaction	11.8	0.1526	ns	No					Interaction	0.003239	0.981	ns	No
genotype	7.776	0.2353	ns	No					genotype	0.006304	0.9735	ns	No
colitis	42.65	0.0169	*	Yes					colitis	57.21	0.0113	*	Yes
ANOVA table	SS	DF	MS	F (DFn, DFd)	P value				ANOVA table	SS	DF	MS	F (DFn, DFd)	P value
Interaction	7554	1	7554	F (1, 8) = 2.498	P=0.1526				Interaction	12.2	1	12.2	F (1, 8) = 0.0006057	P=0.9810
genotype	4979	1	4979	F (1, 8) = 1.647	P=0.2353				genotype	23.74	1	23.74	F (1, 8) = 0.001179	P=0.9735
colitis	27308	1	27308	F (1, 8) = 9.032	P=0.0169				colitis	215493	1	215493	F (1, 8) = 10.70	P=0.0113
Residual	24187	8	3023						Residual	161134	8	20142
Number of missing values	0								Number of missing values	0
Compare each cell mean with the other cell mean in that column									Compare each cell mean with the other cell mean in that column
Number of families	1								Number of families	1
Number of comparisons per family	2								Number of comparisons per family	2
Alpha	0.05								Alpha	0.05
Holm-Sidak's multiple comparisons test	Mean Diff.	Significant?	Summary	Adjusted P Value					Holm-Sidak's multiple comparisons test	Mean Diff.	Significant?	Summary	Adjusted P Value
WT - Smarcad1-KO									WT - Smarcad1-KO
control	-9.44	No	ns	0.8387					control	-0.7967	No	ns	0.999
colitis	90.92	No	ns	0.1489					colitis	-4.83	No	ns	0.999
Test details	Mean 1	Mean 2	Mean Diff.	SE of diff.	N1	N2	t	DF	Test details	Mean 1	Mean 2	Mean Diff.	SE of diff.	N1	N2	t	DF
WT - Smarcad1-KO									WT - Smarcad1-KO
control	8.7	18.14	-9.44	44.9	3	3	0.2103	8	control	4.027	4.823	-0.7967	115.9	3	3	0.006875	8
colitis	154.3	63.37	90.92	44.9	3	3	2.025	8	colitis	270	274.9	-4.83	115.9	3	3	0.04168	8

## Sheet: Fig7a
Statistical analysis supplementary table 1
Identification of outliers in observed species dataset Fig. 7a, redundant identification on Chao dataset revealed same outliers.
	standard	enriched	donor
Method
ROUT (Q = 0.1%)
Number of points
# Y values analyzed	20	20	3
Outliers	3	1	0
Cleaned dataset
	standard																				enriched																				donor
Species		264	269	267	259	276	261			293	276	226	278	265	269	274	294	241	240	241	309	317	288	289	304	298	290	324	319	289	286	303	309	270	289	283	308	296	293		360	373	350
Outliers
	standard																				enriched																				donor
Species	437
Species								414
Species									569
Species																																								474
1-way ANOVA Fig 7a left										1-way ANOVA Fig 7a right
ANOVA summary										ANOVA summary
F	53.58									F	30.07
P value	<0.0001									P value	<0.0001
P value summary	****									P value summary	****
Significant diff. among means (P < 0.05)?	Yes									Significant diff. among means (P < 0.05)?	Yes
R square	0.7485			1ggt						R square	0.6255
Brown-Forsythe test										Brown-Forsythe test
F (DFn, DFd)	0.5499 (2, 36)									F (DFn, DFd)	1.252 (2, 36)
P value	0.5818									P value	0.298
P value summary	ns									P value summary	ns
Are SDs significantly different (P < 0.05)?	No									Are SDs significantly different (P < 0.05)?	No
Bartlett's test										Bartlett's test
Bartlett's statistic (corrected)										Bartlett's statistic (corrected)
P value										P value
P value summary										P value summary
Are SDs significantly different (P < 0.05)?										Are SDs significantly different (P < 0.05)?
ANOVA table	SS	DF	MS	F (DFn, DFd)	P value					ANOVA table	SS	DF	MS	F (DFn, DFd)	P value
Treatment (between columns)	27479	2	13740	F (2, 36) = 53.58	P<0.0001					Treatment (between columns)	28670	2	14335	F (2, 36) = 30.07	P<0.0001
Residual (within columns)	9231	36	256.4							Residual (within columns)	17164	36	476.8
Total	36710	38								Total	45834	38
Data summary										Data summary
Number of treatments (columns)	3									Number of treatments (columns)	3
Number of values (total)	39									Number of values (total)	39
Number of families	1									Number of families	1
Number of comparisons per family	3									Number of comparisons per family	3
Alpha	0.05									Alpha	0.05
Holm-Sidak's multiple comparisons test	Mean Diff.	Significant?	Summary	Adjusted P Value						Holm-Sidak's multiple comparisons test	Mean Diff.	Significant?	Summary	Adjusted P Value
standard vs. enriched	-33.81	Yes	****	<0.0001	A-B					standard vs. enriched	-37.48	Yes	****	<0.0001	A-B
standard vs. donor	-96.71	Yes	****	<0.0001	A-C					standard vs. donor	-95.95	Yes	****	<0.0001	A-C
enriched vs. donor	-62.89	Yes	****	<0.0001	B-C					enriched vs. donor	-58.48	Yes	***	0.0001	B-C
Test details	Mean 1	Mean 2	Mean Diff.	SE of diff.	n1	n2	t	DF		Test details	Mean 1	Mean 2	Mean Diff.	SE of diff.	n1	n2	t	DF
standard vs. enriched	264.3	298.1	-33.81	5.346	17	19	6.325	36		standard vs. enriched	295.6	333	-37.48	7.29	17	19	5.141	36
standard vs. donor	264.3	361	-96.71	10.03	17	3	9.644	36		standard vs. donor	295.6	391.5	-95.95	13.67	17	3	7.018	36
enriched vs. donor	298.1	361	-62.89	9.948	19	3	6.322	36		enriched vs. donor	333	391.5	-58.48	13.57	19	3	4.311	36

## Sheet: Fig S1b
Statistical analysis supplementary table 1
biologically relevant comparisons shown in bold text
2-way ANOVA Supplementary Fig. 1b
Compare row means (main row effect)
Number of families	1
Number of comparisons per family	3
Alpha	0.05
Holm-Sidak's multiple comparisons test	Mean Diff.	Significant?	Summary	Adjusted P Value
villus vs. crypt	-95.37	No	ns	0.3762
villus vs. colon	-5.327	No	ns	0.9246
crypt vs. colon	90.04	No	ns	0.3762
Test details	Mean 1	Mean 2	Mean Diff.	SE of diff.	N1	N2	t	DF
villus vs. crypt	22.21	117.6	-95.37	52.87	3	3	1.804	4
villus vs. colon	22.21	27.53	-5.327	52.87	3	3	0.1008	4
crypt vs. colon	117.6	27.53	90.04	52.87	3	3	1.703	4
Source of Variation	% of total variation	P value	P value summary	Significant?
tissue type	34.17	0.2432	ns	No
sampled animal	32.58	0.2551	ns	No
ANOVA table	SS	DF	MS	F (DFn, DFd)	P value
tissue type	17232	2	8616	F (2, 4) = 2.055	P=0.2432
sampled animal	16432	2	8216	F (2, 4) = 1.96	P=0.2551
Residual	16769	4	4192
Number of missing values	0

## Sheet: Fig S1c
Statistical analysis supplementary table 1
biologically relevant comparisons shown in bold text
2-way ANOVA Suppl. Fig. 1c
Compare each cell mean with the other cell mean in that row
Number of families	1
Number of comparisons per family	4
Alpha	0.05
Holm-Sidak's multiple comparisons test	Mean Diff.	Significant?	Summary	Adjusted P Value
WT - Smarcad1-KO
ISC	2.3651	Yes	**	0.0099
TA	2.87632	Yes	**	0.0034
AE	1.04584	No	ns	0.1694
CO	4.47382	Yes	****	<0.0001
Test details	Mean 1	Mean 2	Mean Diff.	SE of diff.	N1	N2	t	DF
WT - Smarcad1-KO
ISC	3.83236	1.46726	2.3651	0.726761	3	3	3.25431	16
TA	3.77944	0.903119	2.87632	0.726761	3	3	3.95773	16
AE	1.04584	0	1.04584	0.726761	3	3	1.43904	16
CO	4.95022	0.476398	4.47382	0.726761	3	3	6.15583	16
Source of Variation	% of total variation	P value	P value summary	Significant?
Interaction	10.7041	0.0312	*	Yes
tissue	22.8549	0.0016	**	Yes
WT/KO	51.4285	<0.0001	****	Yes
ANOVA table	SS	DF	MS	F (DFn, DFd)	P value
Interaction	9.03835	3	3.01278	F (3, 16) = 3.80271	P=0.0312
tissue	19.2983	3	6.43277	F (3, 16) = 8.11939	P=0.0016
genotype	43.4253	1	43.4253	F (1, 16) = 54.8111	P<0.0001
Residual	12.6764	16	0.792273
Number of missing values	0

[truncated: 11 more sheets: Fig S1d, Fig S3b, Fig S3d, Fig S3e, Fig S3f, Fig S4b, Fig S4c, Fig S6c, Fig S6d, SFig 6e, SFig 6f]
